# Supplementary material for: Inactivation of the dnaK gene in Clostridium difficile 630 Δerm yields a temperature-sensitive phenotype and increases biofilm-forming ability
Source: PubMed Central journal article supplement (PMC5727486; doi:10.1038/s41598-017-17583-9), 2017-12-13

**Inactivation of the *dnaK* gene in *Clostridium difficile* 630  $\Delta$ *erm* yields a temperature-sensitive phenotype and increases biofilm-forming ability**

**Shailesh Jain, Deborah Smyth, Barry M. G. O'Hagan, John T. Heap<sup>1</sup>, Geoff McMullan<sup>2</sup>, Nigel P. Minton<sup>3</sup> and Nigel G. Ternan\***

Nutrition Innovation Centre for Food and Health (NICHE), School of Biomedical Sciences, University of Ulster, Coleraine, Co. Londonderry, N. Ireland, BT52 1SA, U. K.

<sup>1</sup>Centre for Synthetic Biology and Innovation, Department of Life Sciences, Imperial College London, South Kensington Campus, London SW7 2AZ, U. K.

<sup>2</sup>Institute for Global Food Security, School of Biological Sciences, Queen's University Belfast, N. Ireland, United Kingdom BT9 7BL, U. K.

<sup>3</sup>Clostridia Research Group, BBSRC/EPSRC Synthetic Biology Research Centre (SBRC), University of Nottingham, University Park, Nottingham NG7 2RD, U. K.

## Supplementary data S1

|                                                                                                                                                                                                                                                                                                                                                                                |
|--------------------------------------------------------------------------------------------------------------------------------------------------------------------------------------------------------------------------------------------------------------------------------------------------------------------------------------------------------------------------------|
| <i>Hind</i> III                                                                                                                                                                                                                                                                                                                                                                |
| AAAAA AGCTTATAATTATCCTTAAATTCCTTCTTAGTGCGCCAGATAGGGTGTAAAGTCAAGTAGTTAAGG<br>TACTACTCTGTAAGATAACACAGAAAACAGCCAACCTAACCGAAAAGCGAAAAGCTGATACGGGAACAGAGCA<br>CGGTTGGAAAGCGATGAGTTACCTAAAGACAATCGGGTACGACTGAGTCGCAATGTTAATCAGATATAAGGT<br>ATAAGTTGTGTTTAC TGAACGCAAGTTTCTAATTCGATTGAATTCGATAGAGGAAAGTGCTGAAACCTCTA<br>GTACAAAGAAAGGTAAGTTAGCTAAGAAGACTTATCTGTTATCACCACATTGTACAATCTG |
| <i>Bsr</i> GI                                                                                                                                                                                                                                                                                                                                                                  |

**The 353 bp targeting region for *dnaK* gene from pMTL007C-E2.** The unique *Hind*III and *Bsr*GI restriction sites are shown in red (purple line indicates cut site), IBS primer sequence is highlighted in yellow, EBS2 primer sequence is highlighted in green, and the reverse complement of EBS1d primer sequence is highlighted in blue.

**PCR1 across intron/exon junction. EBS universal and Gene specific R1 (for antisense insertion) yields 428bp product from the *dnaK* mutant only as per Fig. 1a, lane 2.**

- Sequence derived from sequencing using EBS universal primer:

>PCF-R1SJ-EBS-(PCR\_1\_EBS.ab1) 227nt

ATTGCGACTCAGTCGTACCCGATTGTCTTTAGGTAACCTCATCGCTTTCCAACCGTGCTCTGTTCCCGTATCAGCT  
TTCGCTTTTCGGTTAGGTTGGCTGTTTTCTGTGTTATCTTACAGAGTAGTACCTTAACTACTTGACTTAACACC  
CTATCTGGGCGCACTAAGAAAGAATTATCATCAACAATGAGTTCAAACATAAACTTACCTTTCATACCTGCTAC  
AGA

When this sequence analysed using BlastN using the *C. difficile* 630 genome, nucleotides 164-226 match AM180355.1 (2,840,918..2,840,980) – this is *dnaK*, 62nucleotides of seq (underlined).

When analysed by BlastN in the nr db, nucleotides 1-165 match pMTL007-CE2, 165 nucleotides of sequence. Highlighted nucleotide is position 723.

- Sequence derived from sequencing using Cdi-*dnaK*-R primer:

>PCF-R1SJ-SR (PCR\_1\_SR.ab1) 251nt

ACTCTTGTTGATGATAATTCTTTCTTAGTGCGCCAGATNGGGTGGTTAAGTCAAGTAGTTAAGGTACTCCT  
CTGTAAGATAACACAGAAAACAGCCAACCTAACCGAATAGCGAAAGCTGATACGGGAACAGAGCACGGTCG  
GAAAGCGATGAGTTACCTAAAGACAATCGGGTACGACCGAGTCGCAACGTTAATCAGATATAAGGTATAAGT  
TGTGTTTACTGAACGCAAGCTCTTAATTTGGAA

Reverse complement:

>R1-rev-c

TTCCGAAATTAAGAGCTTGC GTTCAGTAAACACA ACTTATACCTTATATCTGATTAACGTTGCGACTCGGTCGT  
ACCCGATTGTCTTTAGGTAACCTCATCGCTTTCCGACCGTGCTCTGTTCCCGTATCAGCTTTTCGCTATTCGGTTAG

## Supplementary data S1

GTTGGCTGTTTTCTGTGTTATCTTACAGAGGAGTACCTTAACTACTTGACTTAACCACCCNATCTGGGCGCCA  
CTAAGAAAGAATTATCATCAACAAGAGT

Upon analysis as above, nucleotides 3-225 match pMTL007-CE2 (221nt), and nucleotides 226-251 matches dnaK (25nt, underlined).

## Supplementary data S1

**PCR across the other intron-exon junction using ErmRAM-R and Cdi-dnaK-F primers generated a 1300 bp product from the dnaK mutant only as per Fig 1c (iii) lane 2.**

- Sequence derived from sequencing using Cdi-dnaK-F primer:

PCR\_3\_SF.ab1 (1016nt)

AATAGTATAGATTATTTAGCAGAGGAATTTAAAAAGCTGAAGGTGTAGATTTAAGAAATGATAAAATGGCTC  
TTCAAAGATTA AAAAGAAGCAGCAGAAAAGGCGTGAAGTAGGGAGGTACCGCCTTGTTACACTACTGTGACT  
GGTTTGACCACCTCTTCGGGAACCGTACGTACCCCTCTCGGAGTATACGGCTCTGTTATTGTTTCGTTTCGTAA  
AAATTCCTGTCGACATTCACCTTGTTTATGAATCACGTGACGATGACAATGAAAGCATACAACAAGAGTTTT  
ACGTTGTTTCGCTATCATTGCCATTTCCAACGCGTGAAGTTCCTATTCTCTAGAAAGTATAGGAACTTCTATAT  
TGATAAAAATAATAATAGTGGGTATAATTAAGTTGTTAGAGAAAACGTATAAATTAGGAGGGATTTCATATGG  
ACCCAAGAGATGCTGGTCTTCTGGTGCTGGTATGAACAAAATATAAAATATTCTCAAACCTTTTTAACGAGT  
GAAAAAGTACTCAACCAATAATAAAACAATTGAATTTAAAAGAAACCGATACCGTTTACGAAATTGGAACAG  
GTAAAGGGCATTAAACGACGAACTGGCTAAAATAAGTAAACAGGTAACGTCTATTGAATTAGACAGTCATCT  
ATTCAACTTATCGTCAGAAAAATAAAACCTGAATACTCGTGTCACTTTAATTCACCAAGATATTCTACAGTTTCA  
ATTCCCTAACAAACAGAGGTATAAAATTGTTGGGAGTATTCTTACCATTTAAGCACACAAATTATTA AAAAAG  
TGGTTTTTGAAAGCCATGCGTCTGACATCTATCTGATTGTTGAAGAAGGATTCTACAAGCGTACCTTGNATATT  
CACCGAACACTNGGGTCTTGCACACTCAAGTCTCGATTGAGCAATTGCTTAAGCTGCCAGCGGAATGCT  
TTCATCCTAAACCAAAGTAAACAGTGTCTAATAAAAACCTTACCCGCCATACCACAGATG

When this sequence was analysed using BlastN and the *C. difficile* 630 genome, nucleotides 1-104 match AM180355.1 – this is dnaK, 104 nucleotides of seq (underlined).

When analysed by BlastN in the nr db, nucleotides 105-1016 match pMTL007-CE2, 912 nucleotides of sequence.

- Sequence derived from sequencing using ErmRAM-R primer:

PCR\_3\_RAM\_R.ab1 REV COMP (1012nt) – matched pMTL007-CE2

TCGGGAACCGTACGTACCCCTCTCGGAGTATACGGCTCTGTTATNNTTCGTTTCGTAAAAATTCCTGTCGACA  
TTCACTTGTGTTTATGAATCACGTGACGATGACAATGAAAGCATACAACAAGAGTTTTACGTTGTTTCGCTATC  
ATTGCCATTTCCAACGCGTGAAGTTCCTATTCTCTAGAAAGTATAGGAACTTCTATATTGATAAAAATAATAA  
TAGTGGGTATAATTAAGTTGTTAGAGAAAACGTATAAATTAGGAGGGATTTCATATGGACCCAAGAGATGCTG  
GTGCTTCTGGTGCTGGTATGAACAAAATATAAAATATTCTCAAACCTTTTTAACGAGTGAAAAAGTACTCAAC  
CAAATAATAAAACAATTGAATTTAAAAGAAACCGATACCGTTTACGAAATTGGAACAGGTAAAGGGCATTAA  
CGACGAAACTGGCTAAAATAAGTAAACAGGTAACGTCTATTGAATTAGACAGTCATCTATTCAACTTATCGTCA  
GAAAAATAAAACCTGAATACTCGTGTCACTTTAATTCACCAAGATATTCTACAGTTTCAATTCCTAACAAACAG  
AGGTATAAAATTGTTGGGAGTATTCTTACCATTTAAGCACACAAATTATTA AAAAAGTGGTTTTTGAAAGCCA  
TGCGTCTGACATCTATCTGATTGTTGAAGAAGGATTCTACAAGCGTACCTTGGATATTCACCGAACACTAGGGT  
TGCTCTTGCACACTCAAGTCTCGATTGAGCAATTGCTTAAGCTGCCAGCGGAATGCTTTTCATCCTAAACAAAA  
GTAAACAGTGTCTTAATAAAAACCTTACCCGCCATACCACAGATGTTCCAGATAAATATTGGAAGCTATATACGTA  
CTTTGTTTCAAATGGGTCAATCGAGAATATCGTCAACTGTTTACTAAAATCAGTTTCATCAAGCAATGAAAC  
ACGCCAAAGTAAACAATTTAAGTACCGTACTTATGAGCAAGTATTGTCTAT

When analysed by BlastN in the nr db, nucleotides 1-1012 match pMTL007-CE2, 912 nucleotides of sequence. Red highlighted nucleotides indicate overlap between sequences.

## Supplementary data S2

## Figure 2 growth curve raw attenuation data

| Derm 37°C |        | Biol rep 1 | Biol rep 2 | Biol rep 3 | Average   | SEM |
|-----------|--------|------------|------------|------------|-----------|-----|
| Time (h)  | D650nm | D650nm     | D650nm     | D650nm     | D650nm    |     |
| 0         | 0.051  | 0.053      | 0.054      | 0.0526667  | 0.0008819 |     |
| 1         | 0.048  | 0.045      | 0.055      | 0.0493333  | 0.0029627 |     |
| 2         | 0.11   | 0.098      | 0.1        | 0.1026667  | 0.0037118 |     |
| 3         | 0.166  | 0.165      | 0.164      | 0.165      | 0.0005774 |     |
| 4         | 0.29   | 0.296      | 0.292      | 0.2926667  | 0.0017638 |     |
| 5         | 0.595  | 0.58       | 0.585      | 0.5866667  | 0.0044096 |     |
| 6         | 0.836  | 0.848      | 0.85       | 0.8446667  | 0.0043716 |     |
| 7         | 1.192  | 1.185      | 1.17       | 1.1823333  | 0.0064893 |     |
| 8         | 1.55   | 1.3        | 1.316      | 1.3886667  | 0.0807988 |     |
| 9         | 1.53   | 1.65       | 1.57       | 1.5833333  | 0.0352767 |     |
| 10        | 1.56   | 1.5        | 1.62       | 1.56       | 0.034641  |     |
| Derm 30°C |        | Biol rep 1 | Biol rep 2 | Biol rep 3 | Average   | SEM |
| Time (h)  | D650nm | D650nm     | D650nm     | D650nm     | D650nm    |     |
| 0         | 0.033  | 0.03       | 0.036      | 0.033      | 0.0017321 |     |
| 1         | 0.045  | 0.04       | 0.043      | 0.0426667  | 0.001453  |     |
| 2         | 0.076  | 0.076      | 0.075      | 0.0756667  | 0.0003333 |     |
| 3         | 0.13   | 0.15       | 0.145      | 0.1416667  | 0.0060093 |     |
| 4         | 0.245  | 0.25       | 0.246      | 0.247      | 0.0015275 |     |
| 5         | 0.408  | 0.42       | 0.412      | 0.4133333  | 0.0035277 |     |
| 6         | 0.604  | 0.612      | 0.632      | 0.616      | 0.0083267 |     |
| 7         | 0.816  | 0.82       | 0.792      | 0.8093333  | 0.0087433 |     |
| 8         | 0.976  | 0.936      | 0.932      | 0.948      | 0.0140475 |     |
| 9         | 1.092  | 1.092      | 1.044      | 1.076      | 0.016     |     |
| 10        | 1.1    | 0.96       | 0.98       | 1.0133333  | 0.0437163 |     |
| Derm 41°C |        | Biol rep 1 | Biol rep 2 | Biol rep 3 | Average   | SEM |
| Time (h)  | D650nm | D650nm     | D650nm     | D650nm     | D650nm    |     |
| 0         | 0.048  | 0.052      | 0.051      | 0.0503333  | 0.0012019 |     |
| 1         | 0.046  | 0.042      | 0.045      | 0.0443333  | 0.0012019 |     |
| 2         | 0.098  | 0.1        | 0.099      | 0.099      | 0.0005774 |     |
| 3         | 0.166  | 0.172      | 0.173      | 0.1703333  | 0.0021858 |     |
| 4         | 0.293  | 0.298      | 0.304      | 0.2983333  | 0.0031798 |     |
| 5         | 0.628  | 0.63       | 0.62       | 0.626      | 0.0030551 |     |
| 6         | 0.916  | 0.964      | 0.892      | 0.924      | 0.021166  |     |
| 7         | 1.224  | 1.244      | 1.276      | 1.248      | 0.0151438 |     |
| 8         | 1.79   | 1.675      | 1.655      | 1.7066667  | 0.0420648 |     |
| 9         | 1.5    | 1.565      | 1.57       | 1.545      | 0.0225462 |     |
| 10        | 1.55   | 1.485      | 1.525      | 1.52       | 0.0189297 |     |
| Derm 45°C |        | Biol rep 1 | Biol rep 2 | Biol rep 3 | Average   | SEM |
| Time (h)  | D650nm | D650nm     | D650nm     | D650nm     | D650nm    |     |
| 0         | 0.025  | 0.036      | 0.028      | 0.0296667  | 0.003283  |     |
| 1         | 0.04   | 0.042      | 0.039      | 0.0403333  | 0.0008819 |     |
| 2         | 0.079  | 0.082      | 0.07       | 0.077      | 0.0036056 |     |
| 3         | 0.145  | 0.13       | 0.125      | 0.1333333  | 0.0060093 |     |
| 4         | 0.253  | 0.258      | 0.22       | 0.2436667  | 0.011921  |     |
| 5         | 0.508  | 0.516      | 0.44       | 0.488      | 0.0241109 |     |
| 6         | 0.728  | 0.656      | 0.688      | 0.6906667  | 0.0208273 |     |
| 7         | 0.772  | 0.764      | 0.752      | 0.7626667  | 0.0058119 |     |
| 8         | 0.8    | 0.832      | 0.784      | 0.8053333  | 0.0141107 |     |
| 9         | 0.7    | 0.724      | 0.744      | 0.7226667  | 0.0127192 |     |
| 10        | 0.65   | 0.68       | 0.66       | 0.6633333  | 0.0088192 |     |

## Supplementary data S2

## Figure 2 growth curve raw attenuation data

| <b>Mutant 37°C</b> | <b>Biol rep 1</b> | <b>Biol rep 2</b> | <b>Biol rep 3</b> | <b>Average</b> | <b>SEM</b> |
|--------------------|-------------------|-------------------|-------------------|----------------|------------|
| <b>Time (h)</b>    | <b>D650nm</b>     | <b>D650nm</b>     | <b>D650nm</b>     | <b>D650nm</b>  |            |
| 0                  | 0.039             | 0.032             | 0.027             | 0.0326667      | 0.0034801  |
| 1                  | 0.033             | 0.03              | 0.032             | 0.0316667      | 0.0008819  |
| 2                  | 0.09              | 0.098             | 0.1               | 0.096          | 0.0030551  |
| 3                  | 0.162             | 0.161             | 0.155             | 0.1593333      | 0.0021858  |
| 4                  | 0.258             | 0.265             | 0.25              | 0.2576667      | 0.0043333  |
| 5                  | 0.347             | 0.347             | 0.345             | 0.3463333      | 0.0006667  |
| 6                  | 0.468             | 0.464             | 0.46              | 0.464          | 0.0023094  |
| 7                  | 0.588             | 0.612             | 0.568             | 0.5893333      | 0.0127192  |
| 8                  | 0.665             | 0.69              | 0.695             | 0.6833333      | 0.0092796  |
| 9                  | 0.7               | 0.75              | 0.765             | 0.7383333      | 0.0196497  |
| 10                 | 0.715             | 0.7               | 0.675             | 0.6966667      | 0.0116667  |

  

| <b>Mutant 30°C</b> | <b>Biol rep 1</b> | <b>Biol rep 2</b> | <b>Biol rep 3</b> | <b>Average</b> | <b>SEM</b> |
|--------------------|-------------------|-------------------|-------------------|----------------|------------|
| <b>Time (h)</b>    | <b>D650nm</b>     | <b>D650nm</b>     | <b>D650nm</b>     | <b>D650nm</b>  |            |
| 0                  | 0.025             | 0.03              | 0.028             | 0.0276667      | 0.001453   |
| 1                  | 0.047             | 0.054             | 0.054             | 0.0516667      | 0.0023333  |
| 2                  | 0.068             | 0.07              | 0.076             | 0.0713333      | 0.0024037  |
| 3                  | 0.12              | 0.11              | 0.115             | 0.115          | 0.0028868  |
| 4                  | 0.2               | 0.211             | 0.205             | 0.2053333      | 0.0031798  |
| 5                  | 0.296             | 0.324             | 0.292             | 0.304          | 0.0100664  |
| 6                  | 0.4               | 0.412             | 0.416             | 0.4093333      | 0.0048074  |
| 7                  | 0.488             | 0.532             | 0.496             | 0.5053333      | 0.0135319  |
| 8                  | 0.664             | 0.624             | 0.6               | 0.6293333      | 0.0186667  |
| 9                  | 0.724             | 0.696             | 0.74              | 0.72           | 0.0128582  |
| 10                 | 0.69              | 0.72              | 0.66              | 0.69           | 0.0173205  |

  

| <b>Mutant 41°C</b> | <b>Biol rep 1</b> | <b>Biol rep 2</b> | <b>Biol rep 3</b> | <b>Average</b> | <b>SEM</b> |
|--------------------|-------------------|-------------------|-------------------|----------------|------------|
| <b>Time (h)</b>    | <b>D650nm</b>     | <b>D650nm</b>     | <b>D650nm</b>     | <b>D650nm</b>  |            |
| 0                  | 0.038             | 0.032             | 0.03              | 0.0333333      | 0.0024037  |
| 1                  | 0.037             | 0.036             | 0.03              | 0.0343333      | 0.0021858  |
| 2                  | 0.09              | 0.095             | 0.092             | 0.0923333      | 0.001453   |
| 3                  | 0.178             | 0.188             | 0.166             | 0.1773333      | 0.0063596  |
| 4                  | 0.248             | 0.238             | 0.241             | 0.2423333      | 0.0029627  |
| 5                  | 0.338             | 0.348             | 0.34              | 0.342          | 0.0030551  |
| 6                  | 0.428             | 0.42              | 0.416             | 0.4213333      | 0.0035277  |
| 7                  | 0.42              | 0.452             | 0.6               | 0.4906667      | 0.0554417  |
| 8                  | 0.525             | 0.53              | 0.475             | 0.51           | 0.0175594  |
| 9                  | 0.515             | 0.525             | 0.505             | 0.515          | 0.0057735  |
| 10                 | 0.58              | 0.505             | 0.5               | 0.5283333      | 0.0258736  |

  

| <b>Mutant 45°C</b> | <b>Biol rep 1</b> | <b>Biol rep 2</b> | <b>Biol rep 3</b> | <b>Average</b> | <b>SEM</b> |
|--------------------|-------------------|-------------------|-------------------|----------------|------------|
| <b>Time (h)</b>    | <b>D650nm</b>     | <b>D650nm</b>     | <b>D650nm</b>     | <b>D650nm</b>  |            |
| 0                  | 0.029             | 0.028             | 0.021             | 0.026          | 0.0025166  |
| 1                  | 0.048             | 0.025             | 0.035             | 0.036          | 0.0066583  |
| 2                  | 0.074             | 0.071             | 0.072             | 0.0723333      | 0.0008819  |
| 3                  | 0.125             | 0.105             | 0.115             | 0.115          | 0.0057735  |
| 4                  | 0.219             | 0.215             | 0.21              | 0.2146667      | 0.0026034  |
| 5                  | 0.328             | 0.324             | 0.292             | 0.3146667      | 0.011392   |
| 6                  | 0.312             | 0.292             | 0.32              | 0.308          | 0.0083267  |
| 7                  | 0.288             | 0.28              | 0.28              | 0.2826667      | 0.0026667  |
| 8                  | 0.216             | 0.256             | 0.244             | 0.2386667      | 0.0118509  |
| 9                  | 0.124             | 0.184             | 0.176             | 0.1613333      | 0.018809   |
| 10                 | 0.14              | 0.12              | 0.11              | 0.1233333      | 0.0088192  |

## Supplementary data S3

## qRT-PCR expression ratios - CD630Derm versus dnaK mutant

| <b>GroESL</b>       | Rep 1     | Rep 2  | Average | Std Dev  |
|---------------------|-----------|--------|---------|----------|
| WT normalized ratio |           |        | 1       |          |
| <i>groEL</i>        | 4.79      | 3.95   | 4.37    | 0.42     |
| <i>groES</i>        | 4.004     | 2.756  | 3.38    | 0.624    |
| <b>dnaK</b>         | Rep 1     | Rep 2  | Average | Std Dev  |
| WT normalized ratio |           |        | 1       |          |
| <i>hrcA</i>         | 1.3145    | 1.056  | 1.18525 | 0.182787 |
| <i>grpE</i>         | 4.256     | 3.421  | 3.8385  | 0.590434 |
| <i>dnaK</i>         | 1.71 1.61 | 2.23   | 1.85    | 0.332866 |
| <i>dnaJ</i>         | 0.296     | 0.212  | 0.254   | 0.059397 |
| <b>fliC</b>         | Rep 1     | Rep 2  | Average | Std Dev  |
| WT normalized ratio |           |        | 1       |          |
| <i>fliC</i>         | 0.346     | 0.1638 | 0.2549  | 0.128835 |

| <b>Gene</b>  | ratio mut/wt | log 2 (ratio) | fold change (2 to power of log ratio) | direction | <b>gene</b>  | fold change | St Dev      |
|--------------|--------------|---------------|---------------------------------------|-----------|--------------|-------------|-------------|
| <i>tpi</i>   | 1            | 0             | 1                                     | N/A       | <i>fliC</i>  | -3.9231071  | 0.128834856 |
| <i>fliC</i>  | 0.2549       | -1.971996722  | 3.923107101                           | down      | <i>groEL</i> | 4.37        | 0.42        |
| <i>groEL</i> | 4.37         | 2.12763328    | 4.37                                  | up        | <i>groES</i> | 3.38        | 0.624       |
| <i>groES</i> | 3.38         | 1.757023247   | 3.38                                  | up        | <i>hrcA</i>  | 1.18525     | 0.182787    |
| <i>hrcA</i>  | 1.18525      | 0.245191393   | 1.18525                               | up        | <i>grpE</i>  | 3.8385      | 0.590434    |
| <i>grpE</i>  | 3.8385       | 1.940542648   | 3.8385                                | up        | <i>dnaK</i>  | 1.85        | 0.332866    |
| <i>dnaK</i>  | 1.85         | 0.887525271   | 1.85                                  | up        | <i>dnaJ</i>  | -3.9370079  | 0.059397    |
| <i>dnaJ</i>  | 0.254        | -1.977099598  | 3.937007874                           | down      |              |             |             |

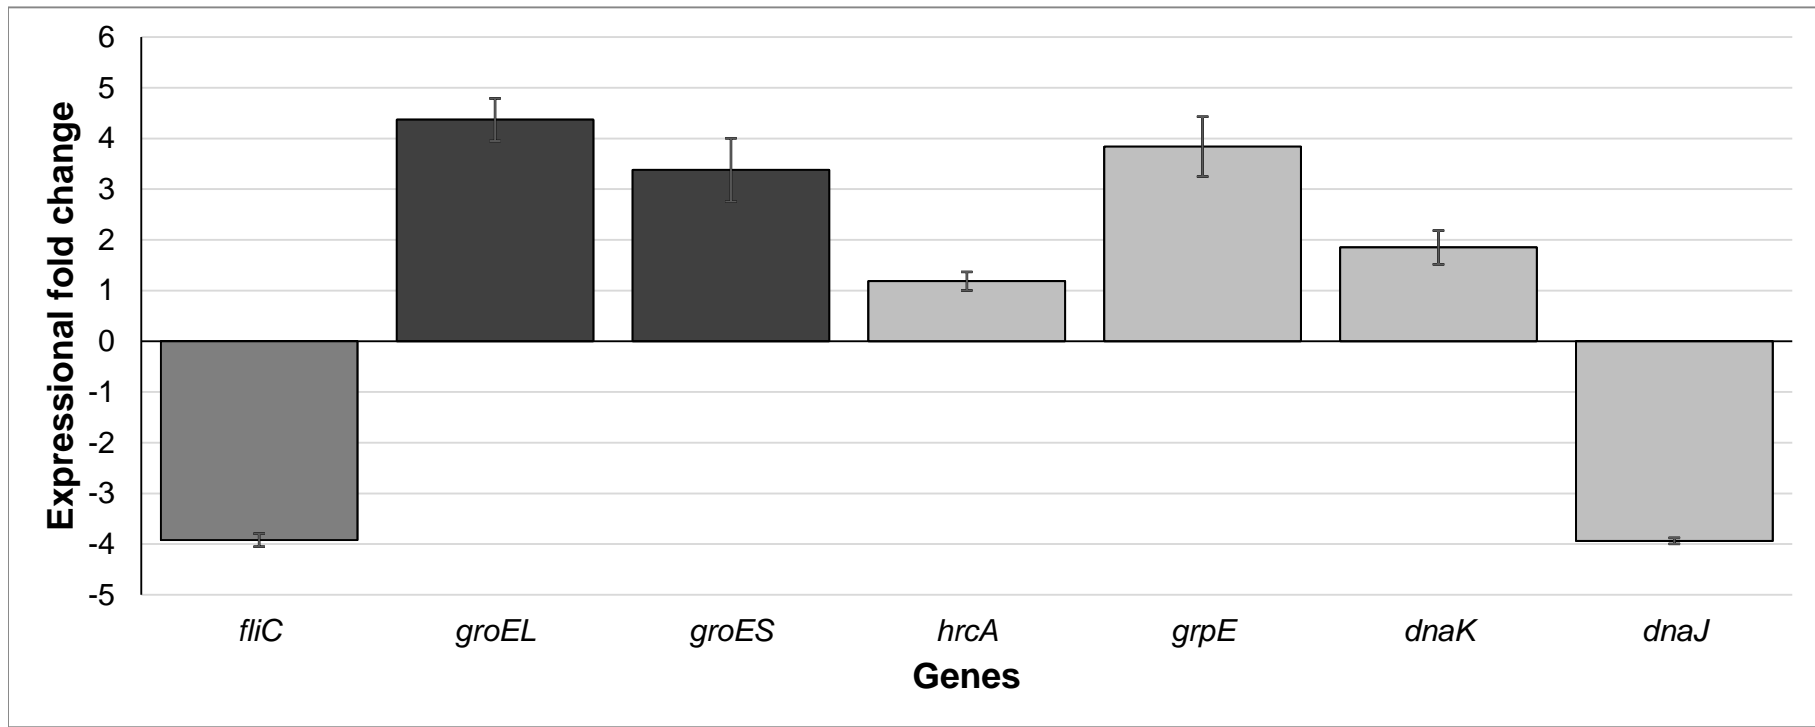



## Supplementary Data S4

**Raw A570 data, 24h**

## Biol Rep 1

|                           | Derm        |           |           |           |           | Mutant   |           |           |           |
|---------------------------|-------------|-----------|-----------|-----------|-----------|----------|-----------|-----------|-----------|
|                           | Media blank | BHIs      | 0.38% Glu | 0.56% Glu | 0.9% Glu  | BHIs     | 0.38% Glu | 0.56% Glu | 0.9% Glu  |
|                           | 0.0835      | 0.1339    | 0.1267    | 0.114     | 0.1345    | 0.2305   | 0.838     | 0.906     | 0.7187    |
|                           | 0.0938      | 0.1227    | 0.1712    | 0.1112    | 0.1721    | 0.1644   | 0.3278    | 0.6699    | 0.5974    |
|                           | 0.1054      | 0.1096    | 0.1116    | 0.1072    | 0.1735    | 0.2634   | 0.8942    | 0.9074    | 0.9666    |
|                           | 0.0938      | 0.106     | 0.1071    | 0.1077    | 0.15      | 0.2037   | 0.8791    | 0.9646    | 0.8475    |
|                           | 0.0929      | 0.1056    | 0.1047    | 0.1112    | 0.1747    | 0.2479   | 0.7211    | 0.6202    | 0.98      |
|                           | 0.0957      | 0.1289    | 0.1088    | 0.1414    | 0.1464    | 0.2251   | 0.7139    | 0.5822    | 0.5933    |
| Mean of 6 tech reps       | 0.094183333 | 0.1177833 | 0.1216833 | 0.11545   | 0.1585333 | 0.2225   | 0.7290167 | 0.77505   | 0.7839167 |
| corrected for media blank |             | 0.0236003 | 0.0275003 | 0.021267  | 0.06435   | 0.128317 | 0.6348337 | 0.680867  | 0.689733  |

## Biol Rep 2

|                           | Derm   |           |           |           |           | Mutant    |           |           |           |
|---------------------------|--------|-----------|-----------|-----------|-----------|-----------|-----------|-----------|-----------|
|                           | Blank  | BHIs      | 0.38% Glu | 0.56% Glu | 0.9% Glu  | BHIs      | 0.38% Glu | 0.56% Glu | 0.9% Glu  |
|                           | 0.0835 | 0.12      | 0.1215    | 0.1156    | 0.1431    | 0.1765    | 0.8537    | 0.7623    | 0.6526    |
|                           | 0.0938 | 0.1245    | 0.0904    | 0.1469    | 0.1218    | 0.1733    | 0.6024    | 0.4973    | 0.6       |
|                           | 0.08   | 0.135     | 0.0929    | 0.1412    | 0.1197    | 0.2448    | 0.3558    | 0.5271    | 0.7944    |
|                           | 0.1    | 0.1289    | 0.0986    | 0.1081    | 0.1224    | 0.3212    | 0.4219    | 0.5514    | 0.9149    |
|                           | 0.111  | 0.131     | 0.1021    | 0.1199    | 0.1658    | 0.2877    | 0.4512    | 0.7416    | 0.8466    |
|                           | 0.0957 | 0.1317    | 0.1152    | 0.1426    | 0.1482    | 0.2799    | 0.5986    | 0.3988    | 0.4849    |
| Mean of 6 tech reps       | 0.094  | 0.1285167 | 0.10345   | 0.12905   | 0.1368333 | 0.2472333 | 0.5472667 | 0.57975   | 0.7155667 |
| corrected for media blank |        | 0.0345167 | 0.00945   | 0.03505   | 0.0428333 | 0.1532333 | 0.4532667 | 0.48575   | 0.621567  |

## Biol Rep 3

|                           | Derm        |           |           |           |           | Mutant   |           |           |           |
|---------------------------|-------------|-----------|-----------|-----------|-----------|----------|-----------|-----------|-----------|
|                           | Blank       | BHIs      | 0.38% Glu | 0.56% Glu | 0.9% Glu  | BHIs     | 0.38% Glu | 0.56% Glu | 0.9% Glu  |
|                           | 0.108       | 0.1142    | 0.1091    | 0.1343    | 0.1197    | 0.2122   | 0.7318    | 0.29      | 0.7554    |
|                           | 0.1071      | 0.1086    | 0.1351    | 0.1307    | 0.1014    | 0.1125   | 0.6834    | 0.798     | 0.4423    |
|                           | 0.0905      | 0.0863    | 0.1201    | 0.1406    | 0.1296    | 0.3019   | 0.3081    | 0.4347    | 0.6209    |
|                           | 0.1107      | 0.1112    | 0.112     | 0.1444    | 0.228     | 0.2425   | 0.7591    | 0.7441    | 0.575     |
|                           | 0.0978      | 0.1163    | 0.101     | 0.1249    | 0.1539    | 0.2138   | 0.2858    | 0.2797    | 0.3206    |
|                           | 0.108       | 0.1383    | 0.1145    | 0.1479    | 0.142     | 0.1825   | 0.5737    | 0.4697    | 0.4165    |
| Mean of 6 tech reps       | 0.103683333 | 0.1124833 | 0.1153    | 0.1371333 | 0.1457667 | 0.2109   | 0.5569833 | 0.5027    | 0.5217833 |
| corrected for media blank |             | 0.0088003 | 0.011617  | 0.0334503 | 0.0420837 | 0.107217 | 0.4533003 | 0.399017  | 0.4181003 |

## Supplementary Data S4

**Raw A570 data, 48h**

## Biol Rep 1

| Blank                     | Derm        |           |           |           |           | Mutant   |           |           |           |  |
|---------------------------|-------------|-----------|-----------|-----------|-----------|----------|-----------|-----------|-----------|--|
|                           | BHIs        | 0.38% Glu | 0.56% Glu | 0.9% Glu  |           | BHIs     | 0.38% Glu | 0.56% Glu | 0.9% Glu  |  |
|                           | 0.0809      | 0.1094    | 0.0997    | 0.1043    | 0.2168    | 0.5998   | 1.1722    | 1.3669    | 1.604     |  |
|                           | 0.1083      | 0.1269    | 0.1236    | 0.1459    | 0.2426    | 0.5512   | 1.0107    | 1.4824    | 1.5       |  |
|                           | 0.0934      | 0.1083    | 0.1192    | 0.15      | 0.2666    | 0.4      | 1.2508    | 1.5931    | 1.1569    |  |
|                           | 0.1078      | 0.1385    | 0.1498    | 0.1471    | 0.1971    | 0.4896   | 0.9312    | 1.1749    | 1.9       |  |
|                           | 0.086       | 0.1878    | 0.1435    | 0.1682    | 0.2062    | 0.5      | 1.1483    | 1.7574    | 1.6092    |  |
|                           | 0.0947      | 0.1257    | 0.1115    | 0.1249    | 0.2116    | 0.4357   | 1.0887    | 1.2676    | 1.8       |  |
| Mean of 6 tech reps       | 0.095183333 | 0.1327667 | 0.12455   | 0.1400667 | 0.2234833 | 0.49605  | 1.1003167 | 1.4403833 | 1.5950167 |  |
| corrected for media blank |             | 0.0375837 | 0.029367  | 0.0448837 | 0.1283003 | 0.400867 | 1.0051337 | 1.3452003 | 1.4998337 |  |

## Biol Rep 2

| Blank                     | Derm        |           |           |          |          | Mutant    |           |           |           |  |
|---------------------------|-------------|-----------|-----------|----------|----------|-----------|-----------|-----------|-----------|--|
|                           | BHIs        | 0.38% Glu | 0.56% Glu | 0.9% Glu |          | BHIs      | 0.38% Glu | 0.56% Glu | 0.9% Glu  |  |
|                           | 0.0927      | 0.1338    | 0.1168    | 0.1294   | 0.1295   | 0.2406    | 0.9978    | 1.5974    | 1.7827    |  |
|                           | 0.0992      | 0.1071    | 0.1817    | 0.1241   | 0.1888   | 0.2453    | 0.8131    | 1.3465    | 1.4717    |  |
|                           | 0.098       | 0.1251    | 0.1767    | 0.1666   | 0.2152   | 0.2544    | 0.7342    | 1.4788    | 1.8219    |  |
|                           | 0.1259      | 0.1244    | 0.1126    | 0.127    | 0.1914   | 0.3215    | 0.8       | 0.9       | 1.3356    |  |
|                           | 0.0891      | 0.1511    | 0.1034    | 0.148    | 0.1826   | 0.266     | 0.9       | 0.7834    | 1.5395    |  |
|                           | 0.0893      | 0.1243    | 0.1068    | 0.1752   | 0.138    | 0.4256    | 0.7389    | 1.1168    | 1.7       |  |
| Mean of 6 tech reps       | 0.099033333 | 0.1276333 | 0.133     | 0.14505  | 0.17425  | 0.2922333 | 0.8306667 | 1.2038167 | 1.6085667 |  |
| corrected for media blank |             | 0.0286003 | 0.033967  | 0.046017 | 0.075217 | 0.1932003 | 0.7316337 | 1.1047837 | 1.5095337 |  |

## Biol Rep 3

| Blank                     | Derm    |           |           |          |           | Mutant    |           |           |          |  |
|---------------------------|---------|-----------|-----------|----------|-----------|-----------|-----------|-----------|----------|--|
|                           | BHIs    | 0.38% Glu | 0.56% Glu | 0.9% Glu |           | BHIs      | 0.38% Glu | 0.56% Glu | 0.9% Glu |  |
|                           | 0.0861  | 0.1213    | 0.1056    | 0.2215   | 0.1921    | 0.3954    | 1.3683    | 1.6718    | 1.0282   |  |
|                           | 0.0957  | 0.0945    | 0.1147    | 0.2643   | 0.1875    | 0.4374    | 1.3124    | 0.941     | 1.2775   |  |
|                           | 0.0955  | 0.1428    | 0.1086    | 0.1593   | 0.1928    | 0.1963    | 0.9027    | 0.823     | 1.0414   |  |
|                           | 0.1     | 0.1259    | 0.1041    | 0.2021   | 0.1364    | 0.4623    | 1.1815    | 1.3796    | 1.2796   |  |
|                           | 0.0845  | 0.1021    | 0.1382    | 0.129    | 0.1836    | 0.1557    | 1.4211    | 1.0891    | 1.1686   |  |
|                           | 0.0965  | 0.1278    | 0.1417    | 0.1443   | 0.1613    | 0.3532    | 1.2272    | 1         | 1.3      |  |
| Mean of 6 tech reps       | 0.09305 | 0.1190667 | 0.1188167 | 0.18675  | 0.1756167 | 0.3333833 | 1.2355333 | 1.15075   | 1.18255  |  |
| corrected for media blank |         | 0.0260167 | 0.0257667 | 0.0937   | 0.0825667 | 0.2403333 | 1.1424833 | 1.0577    | 1.0895   |  |

## Supplementary Data S4

**Raw A570 data, 72h**

## Biol Rep 1

|                           | Derm      |          |           |           |           | Mutant    |           |           |           |
|---------------------------|-----------|----------|-----------|-----------|-----------|-----------|-----------|-----------|-----------|
|                           | Blank     | BHIs     | 0.38% Glu | 0.56% Glu | 0.9% Glu  | BHIs      | 0.38% Glu | 0.56% Glu | 0.9% Glu  |
|                           | 0.086     | 0.1416   | 0.1276    | 0.2176    | 0.2308    | 0.6316    | 1.3661    | 1.4958    | 1.7797    |
|                           | 0.1235    | 0.1255   | 0.1328    | 0.2142    | 0.2962    | 0.7266    | 1.392     | 1.5448    | 1.4926    |
|                           | 0.1202    | 0.167    | 0.1409    | 0.2497    | 0.3107    | 0.5375    | 1.1144    | 1.4902    | 1.9047    |
|                           | 0.1364    | 0.2246   | 0.1857    | 0.2552    | 0.268     | 0.6992    | 1.5085    | 1.4296    | 1.9282    |
|                           | 0.0914    | 0.1196   | 0.1738    | 0.2767    | 0.3395    | 0.6986    | 1.2321    | 1.2859    | 1.4705    |
|                           | 0.106     | 0.17     | 0.3107    | 0.2069    | 0.1566    | 0.8109    | 1.0073    | 1.2043    | 1.3644    |
| Mean of 6 tech reps       | 0.1105833 | 0.15805  | 0.1785833 | 0.2367167 | 0.2669667 | 0.6840667 | 1.2700667 | 1.4084333 | 1.6566833 |
| corrected for media blank |           | 0.047467 | 0.0680003 | 0.1261337 | 0.1563837 | 0.5734837 | 1.1594837 | 1.2978503 | 1.5461003 |

## Biol Rep 2

|                           | Derm    |           |           |           |           | Mutant  |           |           |           |
|---------------------------|---------|-----------|-----------|-----------|-----------|---------|-----------|-----------|-----------|
|                           | Blank   | BHIs      | 0.38% Glu | 0.56% Glu | 0.9% Glu  | BHIs    | 0.38% Glu | 0.56% Glu | 0.9% Glu  |
|                           | 0.0901  | 0.1687    | 0.1764    | 0.1439    | 0.1344    | 0.8207  | 0.9521    | 1.2593    | 1.8681    |
|                           | 0.1153  | 0.1546    | 0.1749    | 0.1703    | 0.2251    | 1.0083  | 0.9336    | 1.5275    | 1.4838    |
|                           | 0.0855  | 0.1717    | 0.1771    | 0.1709    | 0.1415    | 0.9075  | 1.2782    | 1.4761    | 1.6154    |
|                           | 0.116   | 0.1611    | 0.2036    | 0.1754    | 0.1795    | 0.701   | 0.9955    | 1.3274    | 1.7936    |
|                           | 0.1073  | 0.1793    | 0.2881    | 0.1899    | 0.1659    | 0.723   | 0.966     | 1.6195    | 1.4489    |
|                           | 0.0993  | 0.1542    | 0.2182    | 0.17      | 0.1495    | 0.938   | 1.3017    | 1.2599    | 1.48      |
| Mean of 6 tech reps       | 0.10225 | 0.1649333 | 0.2063833 | 0.1700667 | 0.1659833 | 0.84975 | 1.0711833 | 1.4116167 | 1.6149667 |
| corrected for media blank |         | 0.0626833 | 0.1041333 | 0.0678167 | 0.0637333 | 0.7475  | 0.9689333 | 1.3093667 | 1.5127167 |

## Biol Rep 3

|                           | Derm   |           |           |           |           | Mutant    |           |           |           |
|---------------------------|--------|-----------|-----------|-----------|-----------|-----------|-----------|-----------|-----------|
|                           | Blank  | BHIs      | 0.38% Glu | 0.56% Glu | 0.9% Glu  | BHIs      | 0.38% Glu | 0.56% Glu | 0.9% Glu  |
|                           | 0.0886 | 0.116     | 0.2132    | 0.2112    | 0.2178    | 0.5349    | 0.7522    | 1.1413    | 1.2967    |
|                           | 0.1062 | 0.1258    | 0.1697    | 0.2695    | 0.2117    | 0.6934    | 0.9069    | 1.192     | 1.1597    |
|                           | 0.0807 | 0.14      | 0.2285    | 0.2134    | 0.2495    | 0.6598    | 0.8015    | 1.0945    | 1.2128    |
|                           | 0.1016 | 0.2039    | 0.1768    | 0.2755    | 0.17      | 0.7765    | 1.208     | 1.1435    | 1.3489    |
|                           | 0.0956 | 0.1701    | 0.2063    | 0.2206    | 0.2312    | 0.5229    | 1.0175    | 1.1073    | 1.1032    |
|                           | 0.0829 | 0.1342    | 0.2303    | 0.2513    | 0.1983    | 0.5968    | 0.6697    | 0.9888    | 1.5       |
| Mean of 6 tech reps       | 0.0926 | 0.1483333 | 0.2041333 | 0.24025   | 0.2130833 | 0.6307167 | 0.8926333 | 1.1112333 | 1.2702167 |
| corrected for media blank |        | 0.0557333 | 0.1115333 | 0.14765   | 0.1204833 | 0.5381167 | 0.8000333 | 1.0186333 | 1.1776167 |

## Collated, averaged, blank-corrected A570 data from above figures

| A570 24h   | Derm     |           |           |          | Mutant   |           |           |            |
|------------|----------|-----------|-----------|----------|----------|-----------|-----------|------------|
|            | BHIs     | 0.38% Glu | 0.56% Glu | 0.9% Glu | BHIs     | 0.38% Glu | 0.56% Glu | 0.9% Glu   |
| Biol Rep 1 | 0.0236   | 0.0275    | 0.021267  | 0.06435  | 0.128317 | 0.634834  | 0.680867  | 0.689733   |
| Biol Rep 2 | 0.034517 | 0.00945   | 0.03505   | 0.042833 | 0.153233 | 0.453267  | 0.48575   | 0.621567   |
| Biol Rep 3 | 0.0088   | 0.011617  | 0.03345   | 0.042084 | 0.107217 | 0.4533    | 0.399017  | 0.41810033 |
| Average    | 0.022306 | 0.016189  | 0.029922  | 0.049756 | 0.129589 | 0.5138    | 0.521878  | 0.57646678 |
| SE of mean | 0.007452 | 0.00569   | 0.004352  | 0.0073   | 0.013299 | 0.060517  | 0.083344  | 0.08159166 |

  

| A570 48h   | Derm     |           |           |          | Mutant   |           |           |            |
|------------|----------|-----------|-----------|----------|----------|-----------|-----------|------------|
|            | BHIs     | 0.38% Glu | 0.56% Glu | 0.9% Glu | BHIs     | 0.38% Glu | 0.56% Glu | 0.9% Glu   |
| Biol Rep 1 | 0.037584 | 0.029367  | 0.044884  | 0.1283   | 0.400867 | 1.005134  | 1.3452    | 1.49983367 |
| Biol Rep 2 | 0.0286   | 0.033967  | 0.046017  | 0.075217 | 0.1932   | 0.731634  | 1.104784  | 1.50953367 |
| Biol Rep 3 | 0.026017 | 0.025767  | 0.0937    | 0.082567 | 0.240333 | 1.142483  | 1.0577    | 1.0895     |
| Average    | 0.030734 | 0.0297    | 0.061534  | 0.095361 | 0.278134 | 0.95975   | 1.169228  | 1.36628911 |
| SE of mean | 0.003505 | 0.002373  | 0.016087  | 0.016606 | 0.062857 | 0.120753  | 0.08903   | 0.13842288 |

  

| A570 72h   | Derm     |           |           |          | Mutant   |           |           |            |
|------------|----------|-----------|-----------|----------|----------|-----------|-----------|------------|
|            | BHIs     | 0.38% Glu | 0.56% Glu | 0.9% Glu | BHIs     | 0.38% Glu | 0.56% Glu | 0.9% Glu   |
| Biol Rep 1 | 0.047467 | 0.068     | 0.126134  | 0.156384 | 0.573484 | 1.159484  | 1.29785   | 1.54610033 |
| Biol Rep 2 | 0.062683 | 0.104133  | 0.067817  | 0.063733 | 0.7475   | 0.968933  | 1.309367  | 1.51271667 |
| Biol Rep 3 | 0.055733 | 0.111533  | 0.14765   | 0.120483 | 0.538117 | 0.800033  | 1.018633  | 1.17761667 |
| Average    | 0.055295 | 0.094556  | 0.113867  | 0.113533 | 0.6197   | 0.97615   | 1.208617  | 1.41214456 |
| SE of mean | 0.004398 | 0.013448  | 0.023848  | 0.026971 | 0.06471  | 0.103827  | 0.09505   | 0.11765928 |

Supplementary Data S4

**Values used to construct figures and for statistical analysis**

| A570<br>Derm              |      |          |          |          | SE of mean |          |          |          |
|---------------------------|------|----------|----------|----------|------------|----------|----------|----------|
|                           | 0 hr | 24 hr    | 48 hr    | 72 hr    | 0h         | 24h      | 48h      | 72h      |
| BHIS broth (0.2% glucose) | 0    | 0.022306 | 0.030734 | 0.055295 | 0          | 0.007452 | 0.003505 | 0.004398 |
| 0.38% Glucose             | 0    | 0.016189 | 0.0297   | 0.094556 | 0          | 0.00569  | 0.002373 | 0.013448 |
| 0.56% Glucose             | 0    | 0.029922 | 0.061534 | 0.113867 | 0          | 0.004352 | 0.016087 | 0.023848 |
| 0.9% Glucose              | 0    | 0.049756 | 0.095361 | 0.113533 | 0          | 0.0073   | 0.016606 | 0.026971 |
| A570<br>Mutant            |      |          |          |          | SE of mean |          |          |          |
|                           | 0 hr | 24 hr    | 48 hr    | 72 hr    | 0h         | 24h      | 48h      | 72h      |
| BHIS broth (0.2% glucose) | 0    | 0.129589 | 0.278134 | 0.6197   | 0          | 0.013299 | 0.062857 | 0.06471  |
| 0.38% Glucose             | 0    | 0.5138   | 0.95975  | 0.97615  | 0          | 0.060517 | 0.120753 | 0.103827 |
| 0.56% Glucose             | 0    | 0.521878 | 1.169228 | 1.208617 | 0          | 0.083344 | 0.08903  | 0.09505  |
| 0.9% Glucose              | 0    | 0.576467 | 1.366289 | 1.412145 | 0          | 0.081592 | 0.138423 | 0.117659 |

Calculating P values : t-test calculator, available at: <http://www.graphpad.com/quickcalcs/ttest1/?Format=SEM>

- Group 1 becomes BHIS values (yellow) and Group 2 becomes 0.9% Glucose values (in green) – Mean values and SEM are in the sheet; N = 3 for each group. Enter data and derive the exact P value.
- So, for example, for 48 h *Clostridium difficile* 630Derm, reported P < 0.05. The exact P value is 0.0190 (statistically significant). Similarly, for 72 h, the exact P value is 0.1001 (not significant).
- Similarly, for the mutant, the exact P values for 24, 48, and 72 h are 0.0057 (statistically significant), 0.0020 (statistically significant), and 0.0041 (statistically significant), respectively.

*C. difficile* 630  $\Delta$ erm

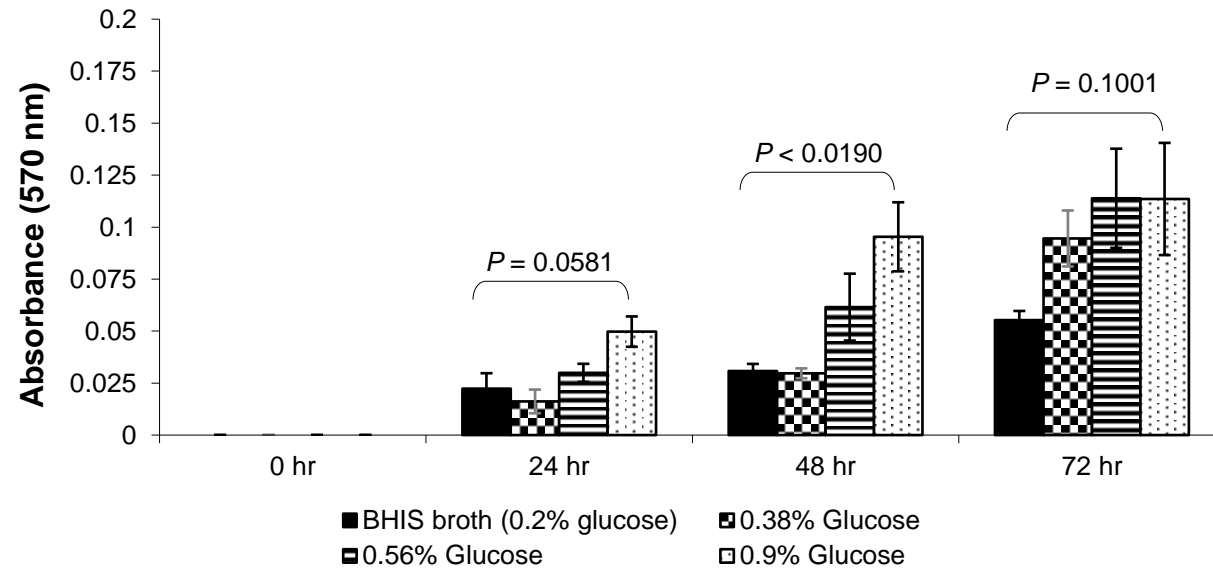

*C. difficile* *dnaK* mutant

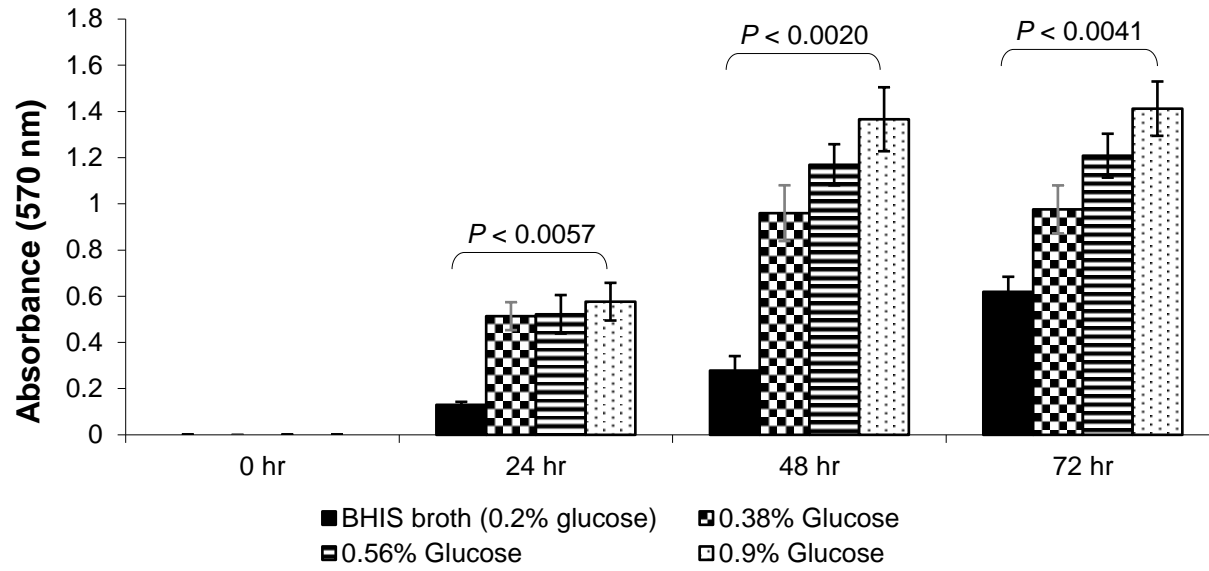

Supplement: 41598_2017_17583_MOESM1_ESM.pdf [file 41598_2017_17583_MOESM1_ESM.pdf]
